# Supplementary material for: Limited nitrogen retention in an urban river receiving raw sewage and wastewater treatment plant effluent
Source: Royal Society of Chemistry journal article supplement (doi:10.1039/c9em00201d), 2019-01-01
Supplement: c9em00201d1.pdf [file c9em00201d1.pdf]

1

## ELECTRONIC SUPPLEMENTARY INFORMATION

2

for

3

**Limited nitrogen retention in an urban river receiving raw**

4

**sewage and wastewater treatment plant effluent**

5

Jingshui Huang <sup>1,2</sup>, Hailong Yin <sup>1,\*</sup>, Seifeddine Jomaa <sup>2</sup>, Michael Rode <sup>2</sup>, Qi Zhou <sup>1</sup>

6

<sup>1</sup> College of Environmental Science and Engineering, Tongji University, Shanghai 200092, China.

7

<sup>2</sup> Department of Aquatic Ecosystem Analysis and Management, Helmholtz Centre for

8

Environmental Research – UFZ, Brückstraße 3a, 39114 Magdeburg, Germany.

9

10

\* Author to whom all correspondence should be addressed: [yinhailong@tongji.edu.cn](mailto:yinhailong@tongji.edu.cn);

11

12

Supplementary Information consists of 8 figures and 1 table.

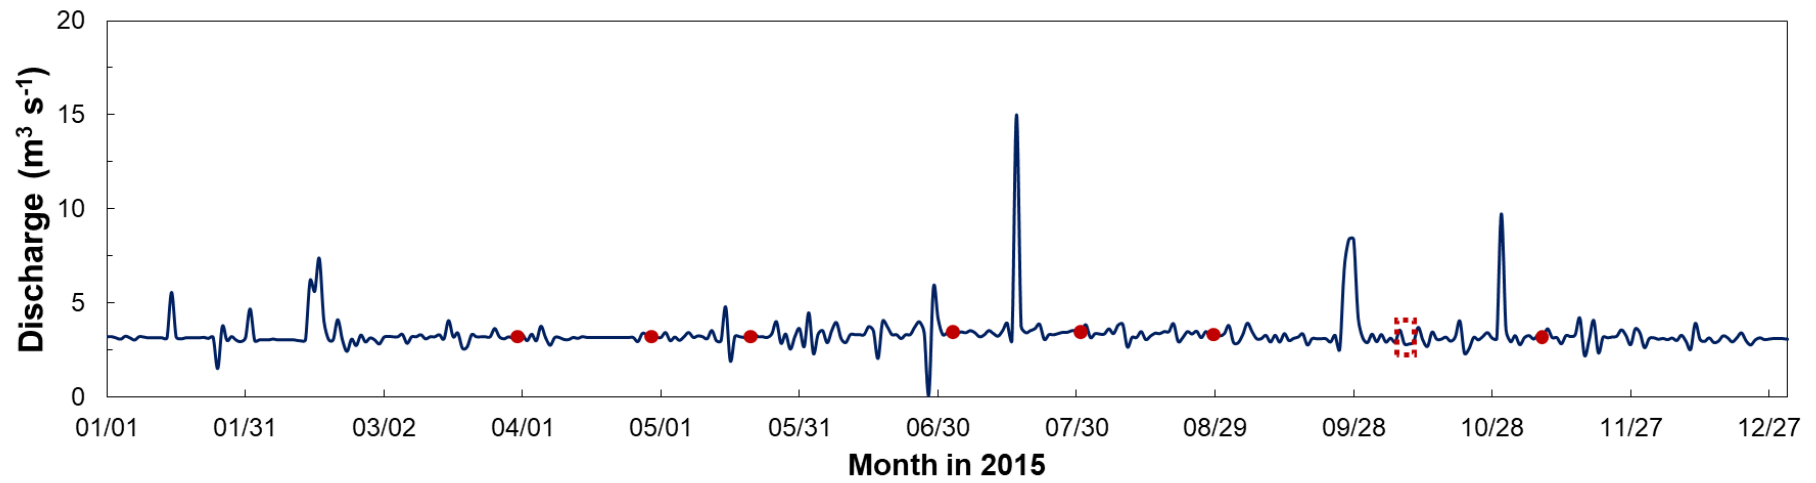

13

14 **Fig. S1** Discharge hydrograph at Site 14 in the Nanfei River for the year 2015. The red dots represent the routine sampling dates. The red  
15 dashed square represents the intensive Lagrange survey under low-flow condition.

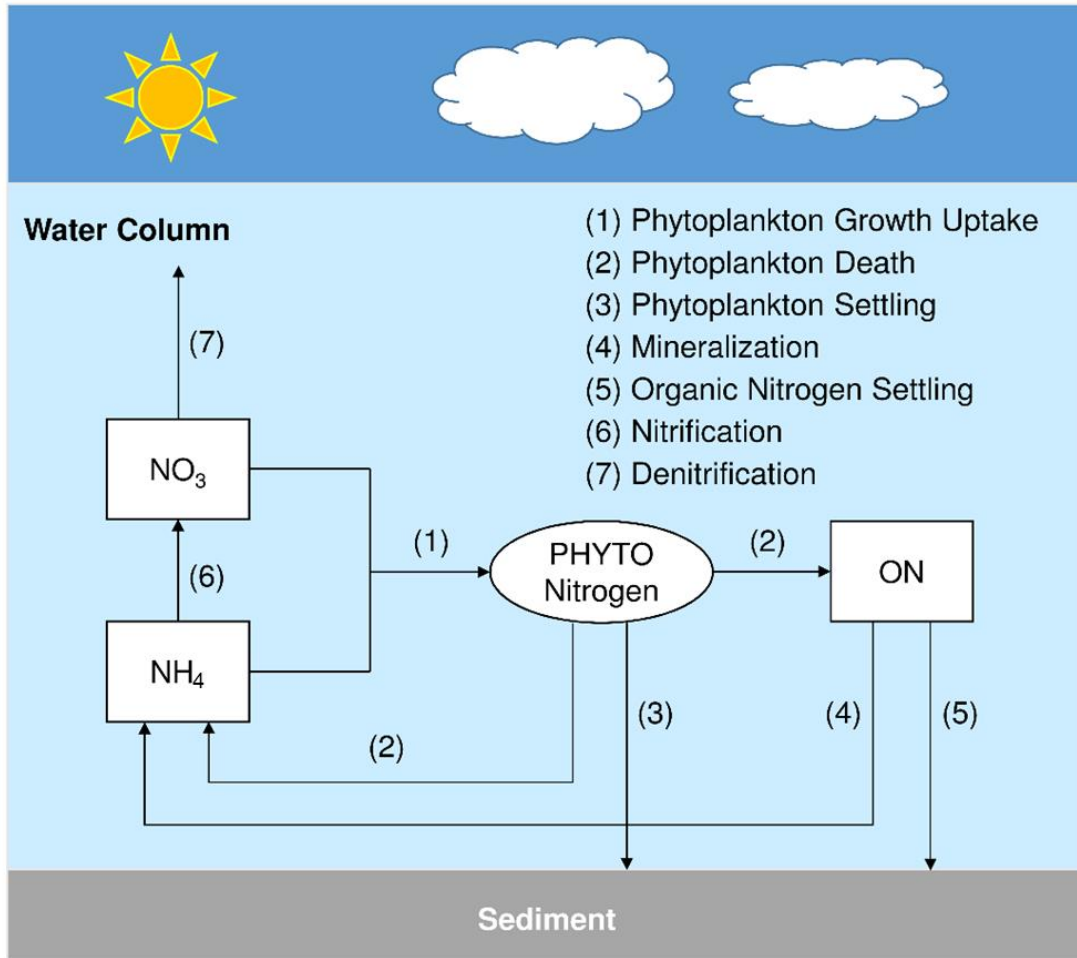

16

17 **Fig. S2** Schematic description of the N cycling in the WASP EUTRO Module.

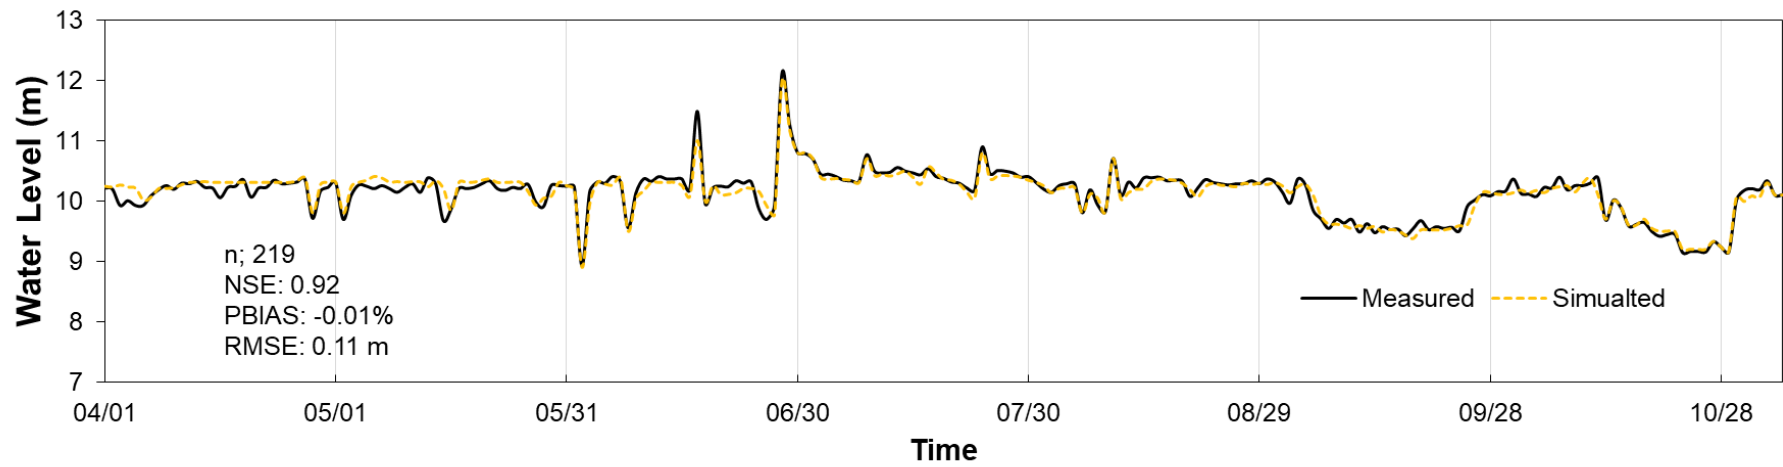

18

19 **Fig. S3** Results of hydrodynamic model validation: comparison of simulated and measured values of water level at Site 14 during 1<sup>st</sup> April - 5<sup>th</sup>  
 20 November 2015; the number of measurements was 219.

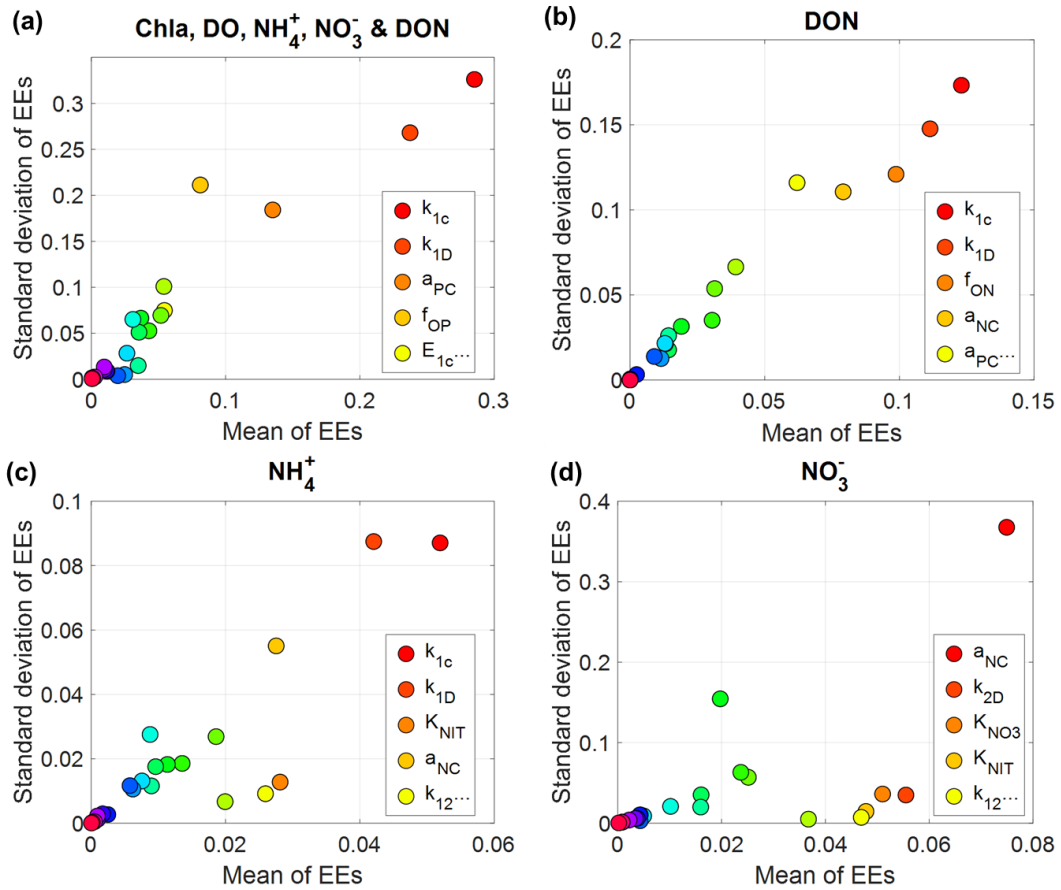

21

22 **Fig. S4** Parameter sensitivity ranking by Elementary Effects (EE) method with different  
 23 objective functions defined respectively by (a) the sum of NSE coefficients of NH<sub>3</sub>, NO<sub>3</sub>,  
 24 DON, Chl-a and DO, the NSE of (b) DON, (c) NH<sub>3</sub>, and (d) NO<sub>3</sub>. The more to the right a  
 25 point along the horizontal axis, the more influential the parameters. The higher up a  
 26 point along the vertical axis, the larger its degree of interactions with other parameters.  
 27 Useful for screening and ranking.<sup>1</sup> The 5 most sensitive parameters for each objective  
 28 function are shown in its legend.

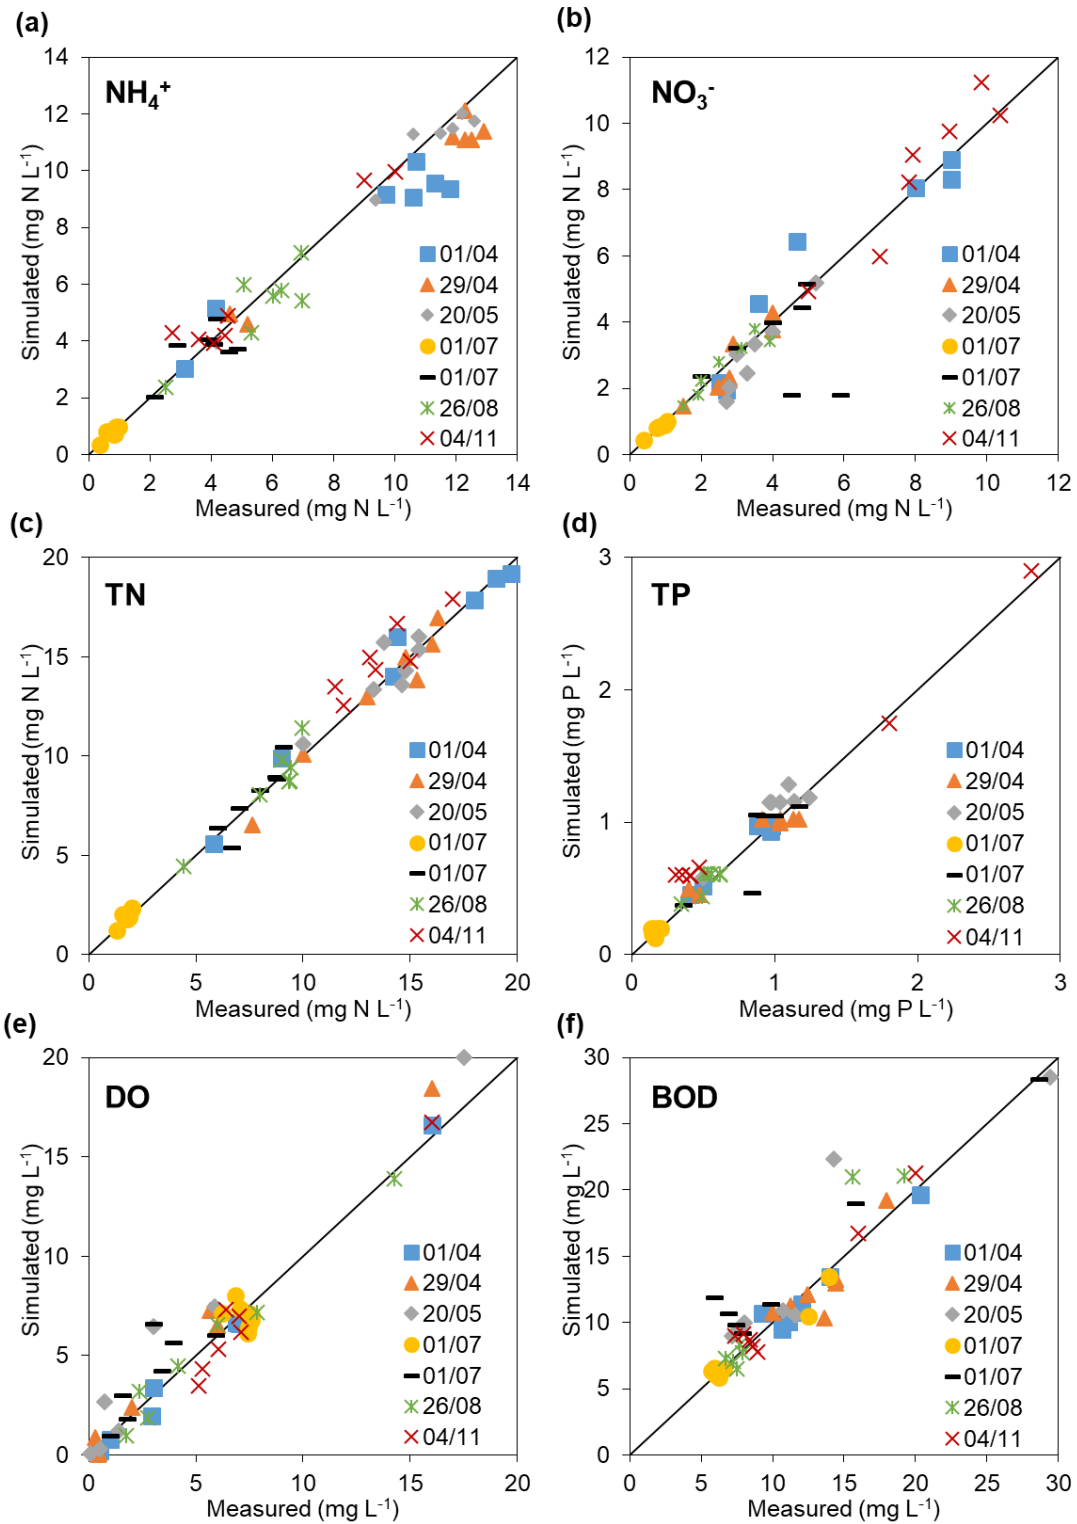

29

30 **Fig. S5** Results of hydrodynamic model validation: comparison of simulated and  
 31 measured values of water level at Site 14 during 1<sup>st</sup> April - 5<sup>th</sup> November 2015; the  
 32 number of measurements was 219.

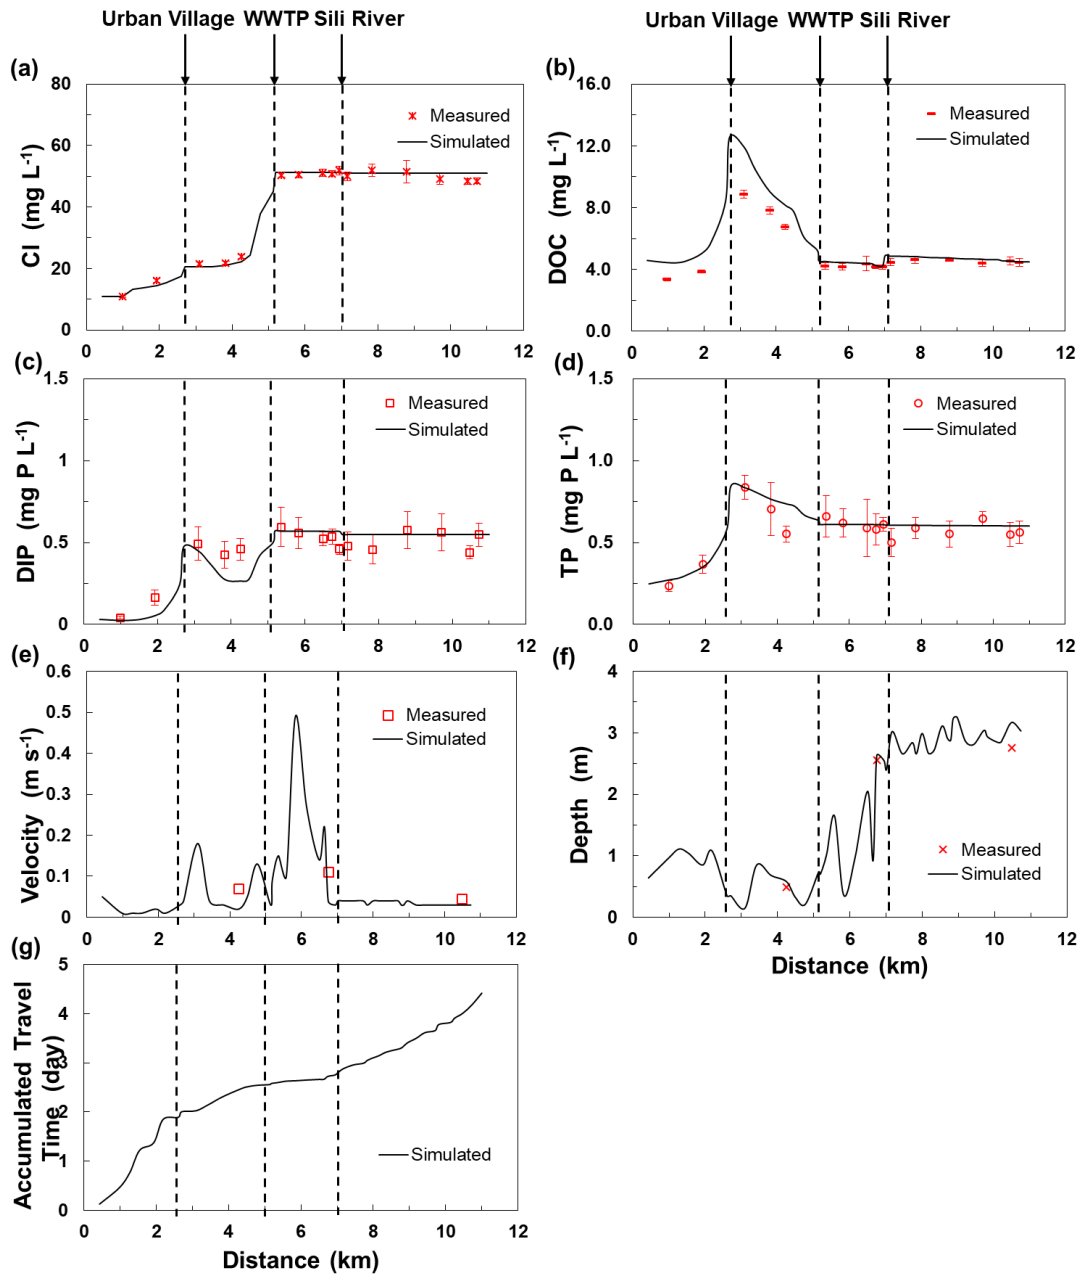

33

34 **Fig. S6** Longitudinal measured and simulated (a) Cl (b) DOC (c) DIP (d) TP (e) velocity

35 (f) depth and simulated (f) accumulated travel time during low-flow conditions in the

36 Nanfei River.

37

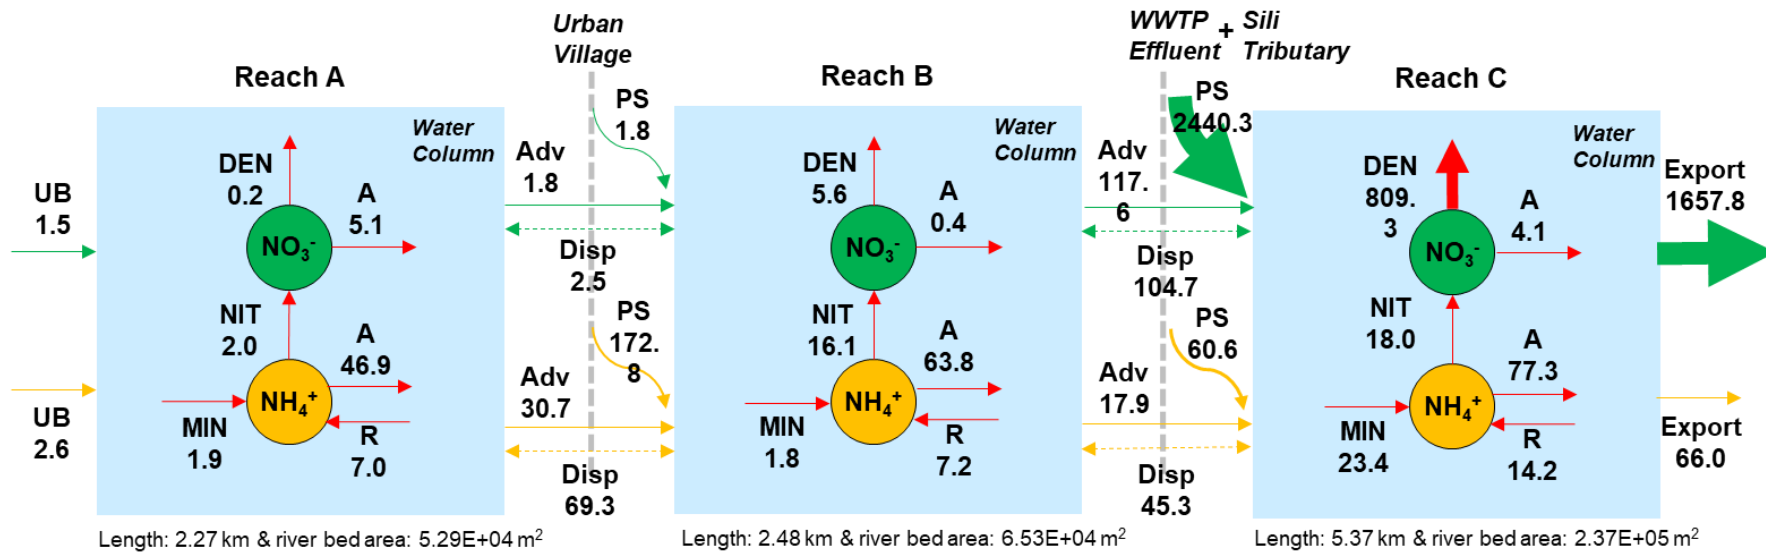

38

**Fig. S7** DIN mass balance fluxes ( $\text{kg N d}^{-1}$ ) including boundaries, advectons, dispersions, loadings, reactions and exports in Reaches A, B and C;

39

UB, Adv and Disp are short for upper boundary, advective and dispersive transport, respectively. The thickness of the arrows indicates the

40

amounts of the fluxes.



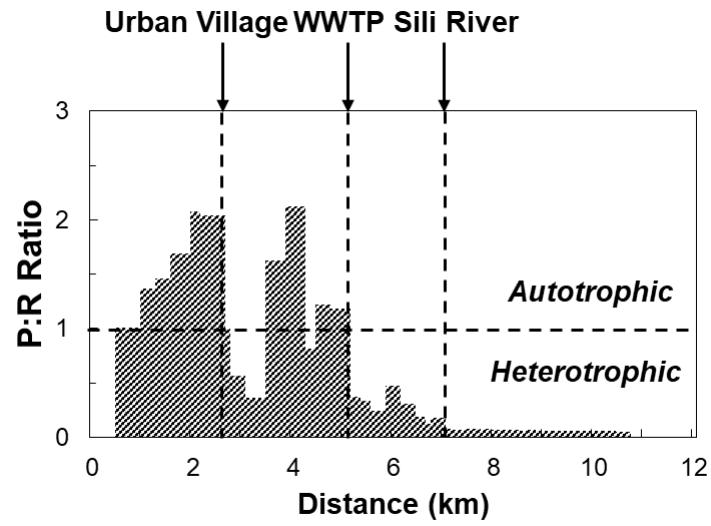

41

42 **Fig. S8** Longitudinal primary production to respiration ratio and metabolism  
 43 condition.<sup>2</sup>

44 **Table S1.** DIN cycling, inputs & exports fluxes (kg N d<sup>-1</sup>) in the three representative  
 45 reaches and whole reach.

| Flux                | Reach A                      |                              | Reach B                      |                              | Reach C                      |                              | Whole Reach                  |                              |
|---------------------|------------------------------|------------------------------|------------------------------|------------------------------|------------------------------|------------------------------|------------------------------|------------------------------|
|                     | NH <sub>4</sub> <sup>+</sup> | NO <sub>3</sub> <sup>-</sup> |
| <b>Inputs</b>       |                              |                              |                              |                              |                              |                              |                              |                              |
| Upper Boundary      | 1.5                          | 2.6                          | 30.7                         | 1.8                          | 17.9                         | 117.6                        | 1.5                          | 2.6                          |
| Urban village       |                              |                              | 172.8                        | 3.5                          |                              |                              | 172.8                        | 3.5                          |
| WWTP                |                              |                              |                              |                              | 19.5                         | 1757.4                       | 19.5                         | 1757.4                       |
| Sili River          |                              |                              |                              |                              | 41.0                         | 682.9                        | 41.0                         | 682.9                        |
| Dispersion          | 69.3                         | 2.5                          | -114.6                       | 102.2                        | 45.3                         | -104.7                       |                              |                              |
| Σ Inputs            | 70.8                         | 5.1                          | 88.9                         | 107.4                        | 123.7                        | 2453.2                       | 234.8                        | 2446.3                       |
| <b>Processes</b>    |                              |                              |                              |                              |                              |                              |                              |                              |
| Mineralization      | 1.9                          |                              | 1.8                          |                              | 23.4                         |                              | 27.0                         |                              |
| Nitrification       | -2.0                         | 2.0                          | -16.1                        | 16.1                         | -18.0                        | 18.0                         | -36.1                        | 36.1                         |
| Phytoplankton death | 7.0                          |                              | 7.2                          |                              | 14.2                         |                              | 28.4                         |                              |
| Assimilatory uptake | -46.9                        | -5.1                         | -63.8                        | -0.4                         | -77.3                        | -4.1                         | -188.0                       | -9.6                         |
| Denitrification     |                              | -0.2                         |                              | -5.6                         |                              | -809.3                       |                              | -815.1                       |
| Σ Processes         | -40.1                        | -3.3                         | -71.0                        | 10.2                         | -57.7                        | -795.4                       | -168.7                       | -788.6                       |
| Export              | 30.7                         | 1.8                          | 17.9                         | 117.6                        | 66.0                         | 1657.8                       | 66.0                         | 1657.8                       |

46

47 **References**

- 48 1. F. Pianosi, K. Beven, J. Freer, J. W. Hall, J. Rougier, D. B. Stephenson and T. Wagener, Sensitivity  
49 analysis of environmental models: A systematic review with practical workflow, *Environmental*  
50 *Modelling & Software*, 2016, **79**, 214-232.
- 51 2. J. Huang, H. Yin, S. Chapra and Q. Zhou, Modelling Dissolved Oxygen Depression in an Urban  
52 River in China, *Water*, 2017, **9**, 520.
